# Supplementary material for: In-Vitro Selection of Ceftazidime/Avibactam Resistance in OXA-48-Like-Expressing Klebsiella pneumoniae: In-Vitro and In-Vivo Fitness, Genetic Basis and Activities of β-Lactam Plus Novel β-Lactamase Inhibitor or β-Lactam Enhancer Combinations
Source: MDPI journal article supplement (doi:10.3390/antibiotics10111318), 2021-10-29
Supplement: s1 [file s1]

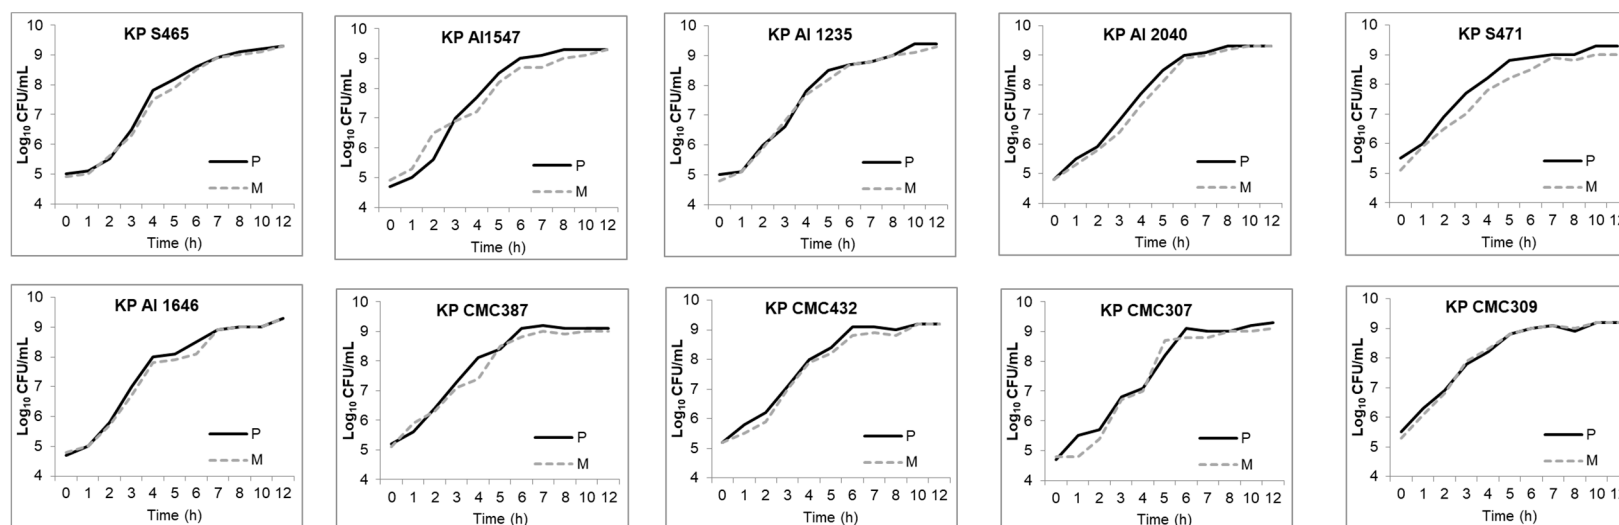

**Figure S1.** Comparative growth kinetics of terminal mutants and their respective parent strains of *bla*<sub>OXA-48-like</sub>-harbouring *K. pneumoniae* in CAMHB medium.

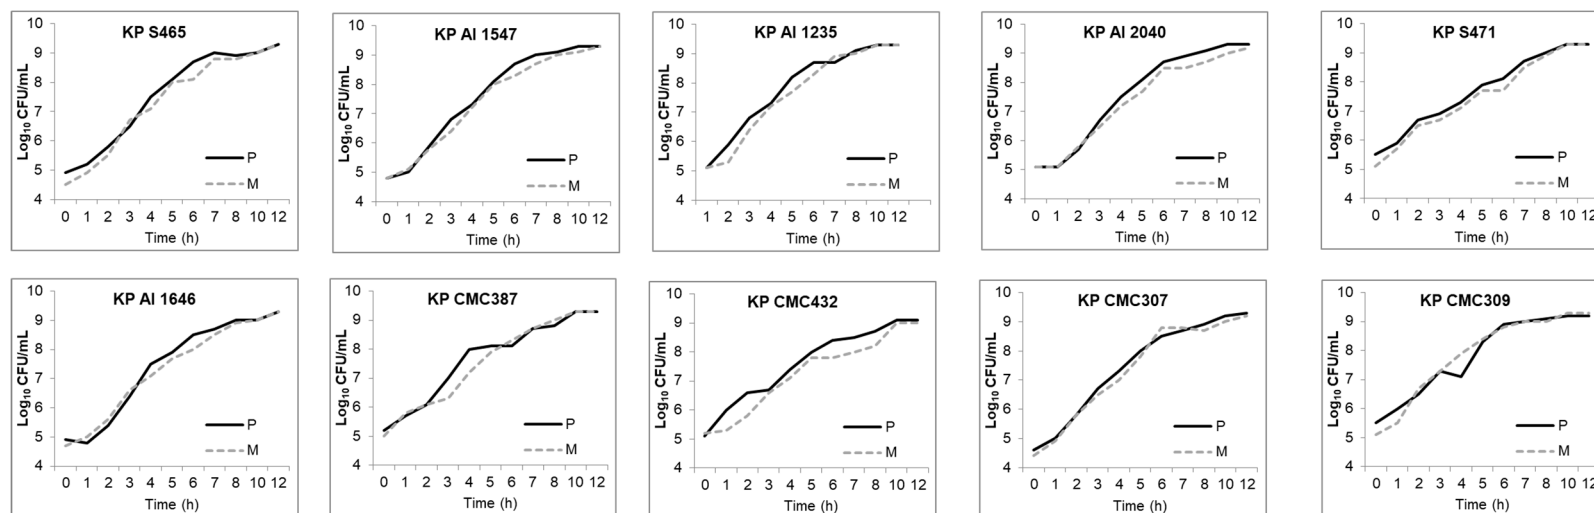

**Figure S2.** Comparative growth kinetics of terminal mutants and their respective parent strains of *bla*<sub>OXA-48-like</sub>-harbouring *K. pneumoniae* in M9 minimal medium.
